# Supplementary material for: Preparation of novel polypyridyl ruthenium complex polymers with high sensitivity for electrogenerated chemiluminescence via copolymerization
Source: Royal Society of Chemistry journal article supplement (doi:10.1039/b9pp00191c), 2010-02-09
Supplement: b9pp00191c.pdf [file b9pp00191c.pdf]

### Supporting information:

$^1\text{H-NMR}$  and  $^1\text{H-}^1\text{H}$  Cosy-NMR of Ru2COOH, Ru2mono and Ru1mono in D-DMSO listed is used to confirm the structure of molecule. The typical hydrogen in the molecular structures is related to the ones in NMR spectrum. According to  $^1\text{H-}^1\text{H}$  Cosy-NMR, we can readily see the coupling interaction between the different hydrogen.

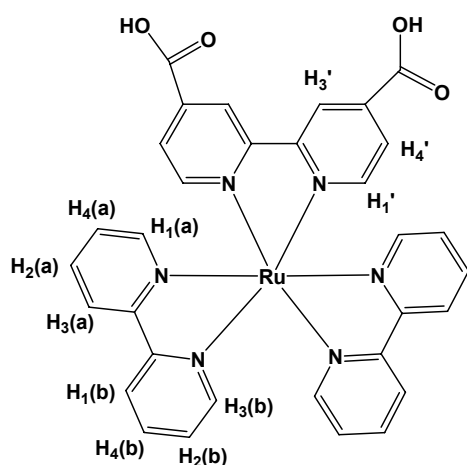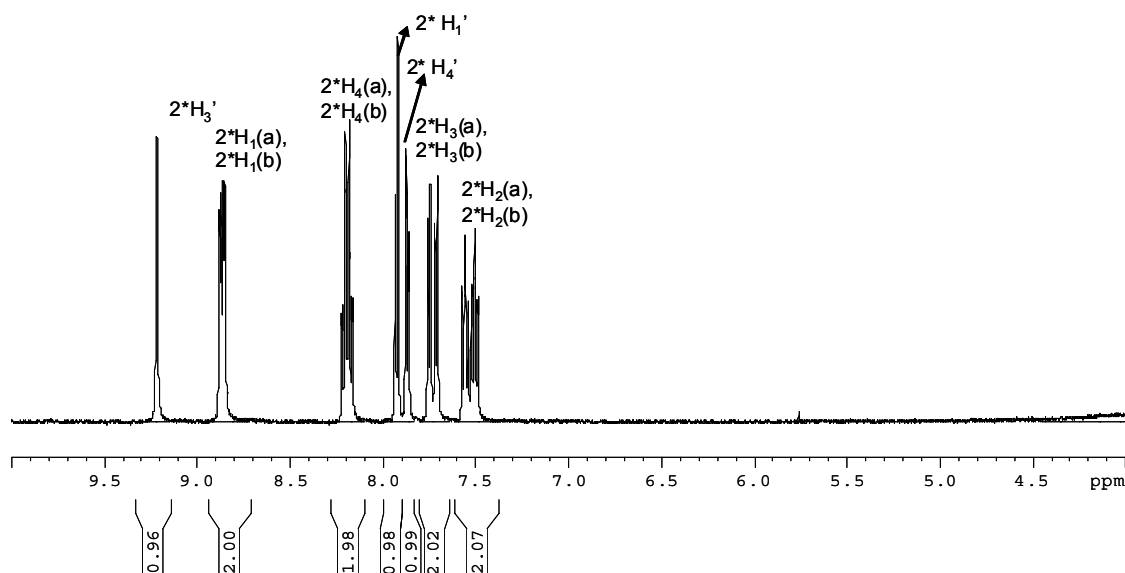

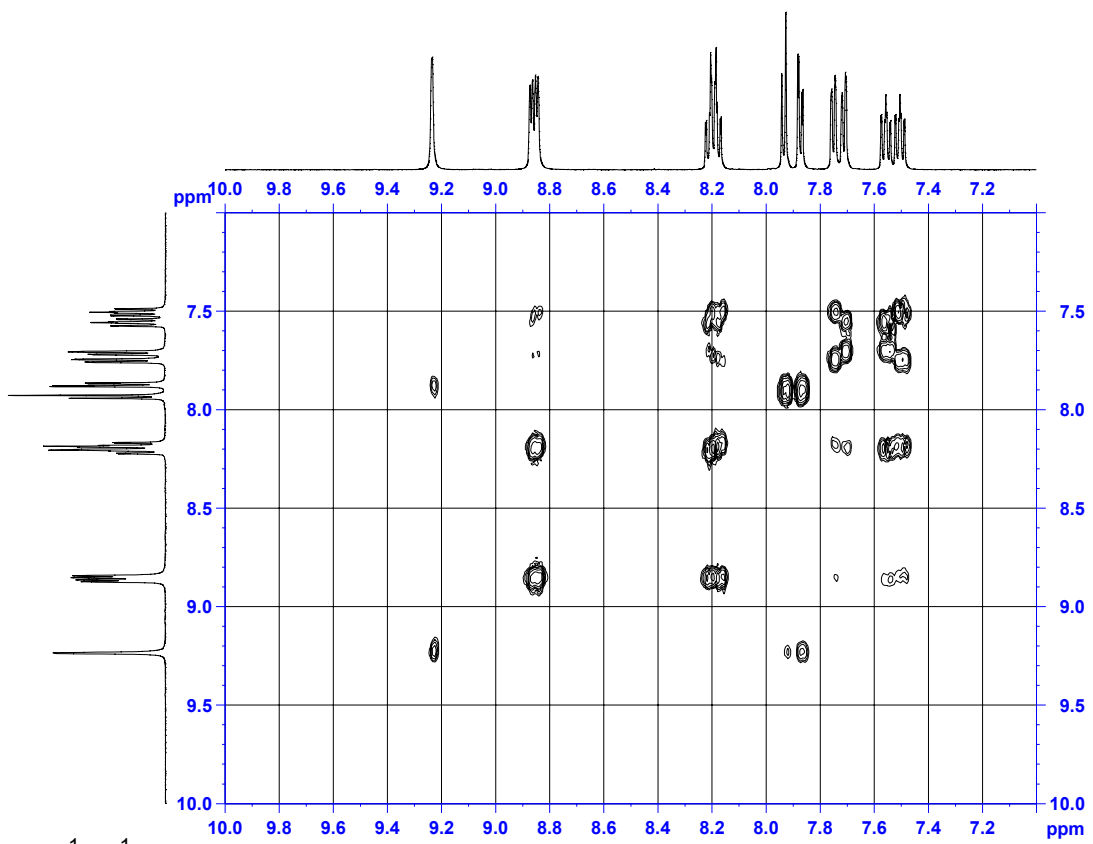

1b.  $^1\text{H}$ - $^1\text{H}$  Cosy-NMR of Ru 2COOH in D-DMSO

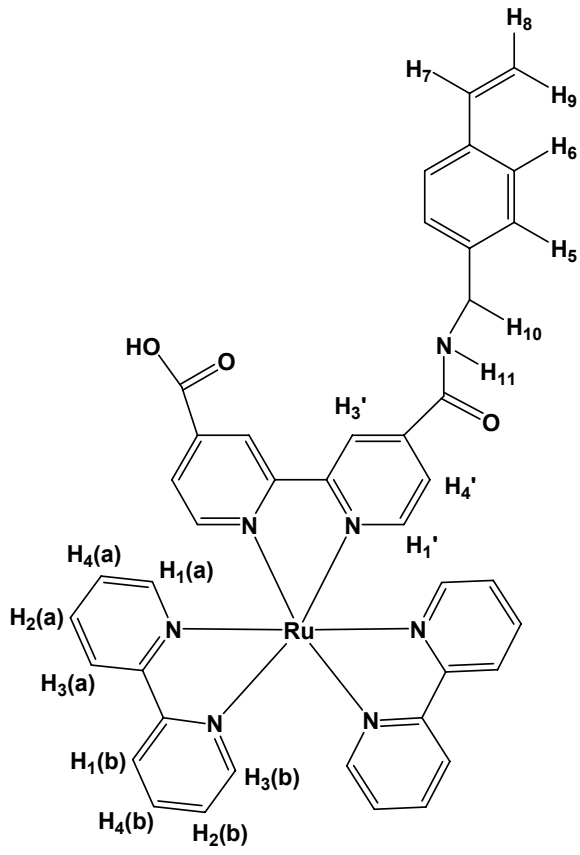

Ru1mono molecular structure

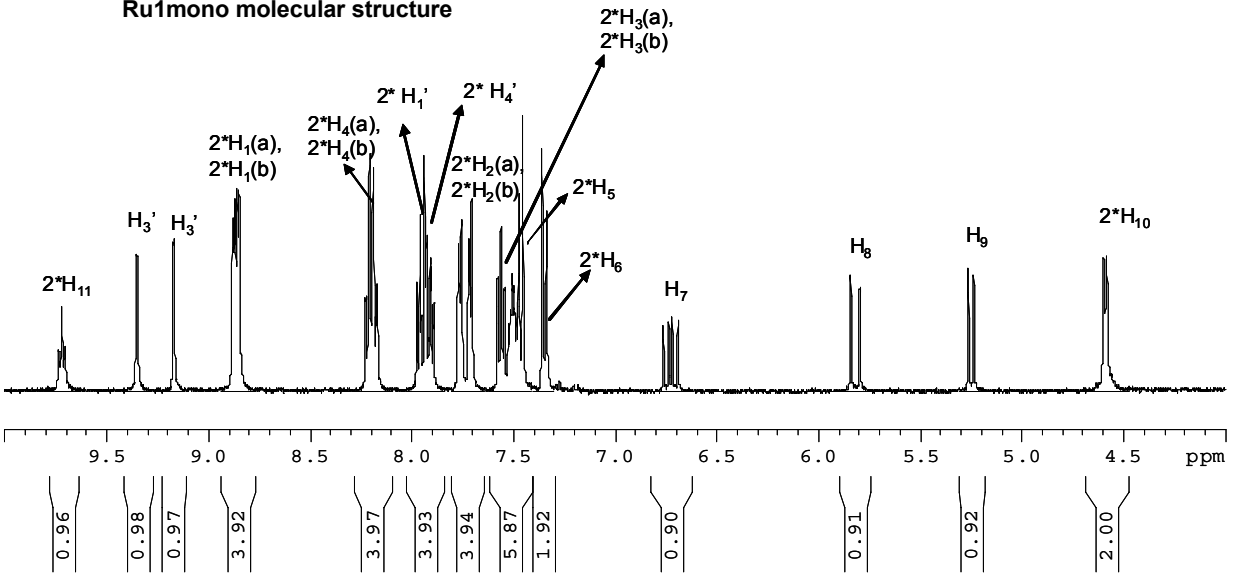

1c. <sup>1</sup>H-NMR of Ru1mono in D-DMSO

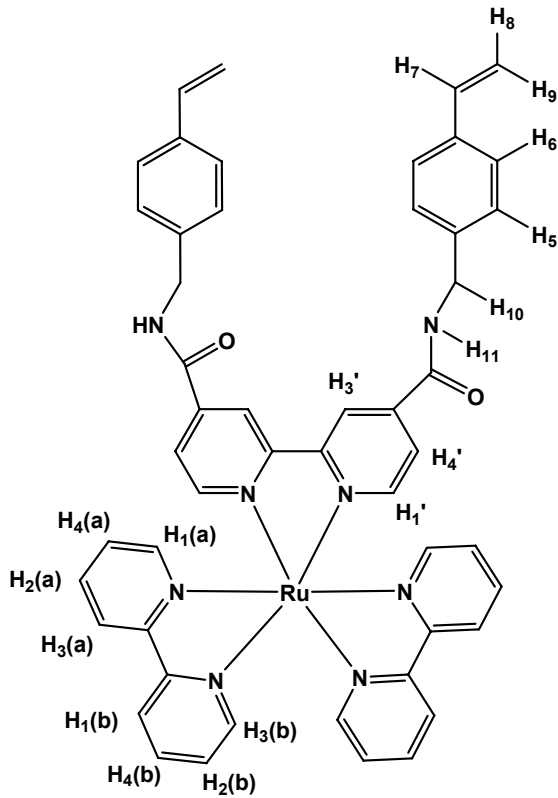

Ru2mono molecular structure

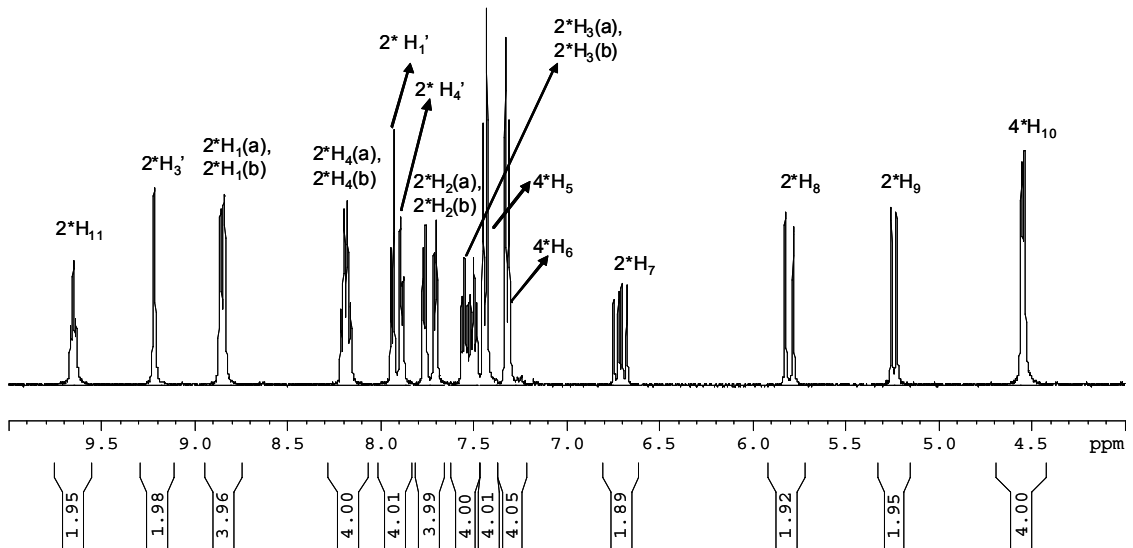

1d. <sup>1</sup>H-NMR of Ru2mono in D-DMSO

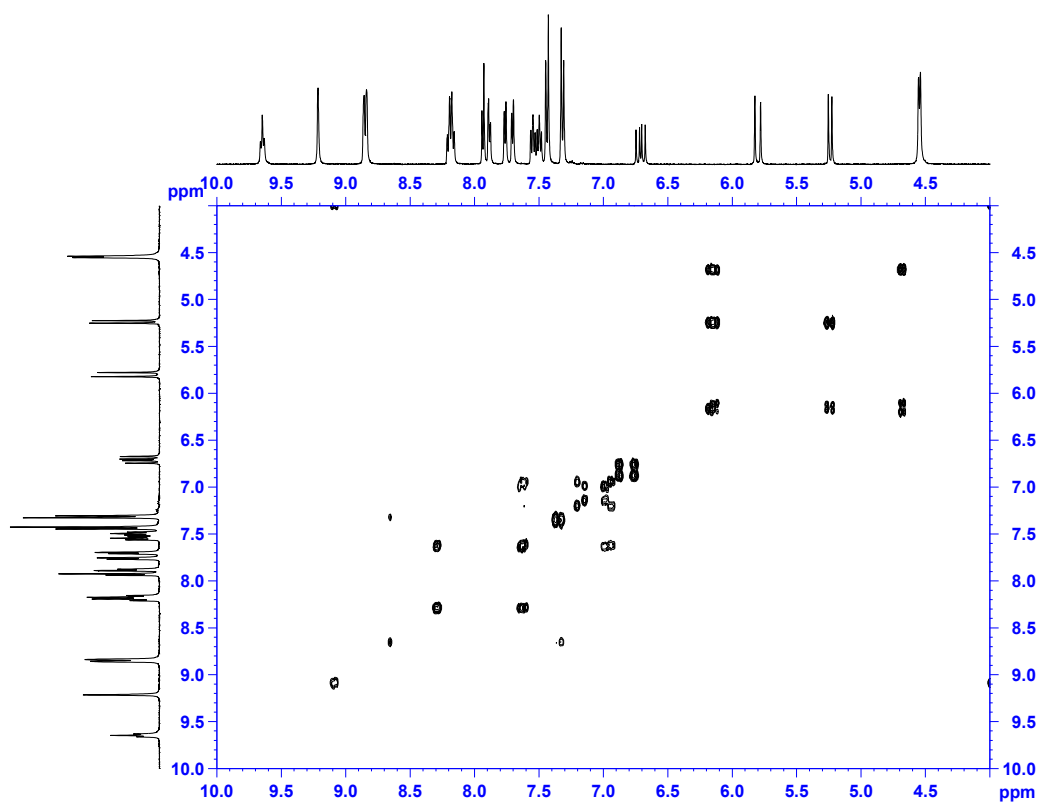

1e.  $^1\text{H}$ - $^1\text{H}$  Cosy-NMR of Ru2mono in D-DMSO in range from 10-4 ppm

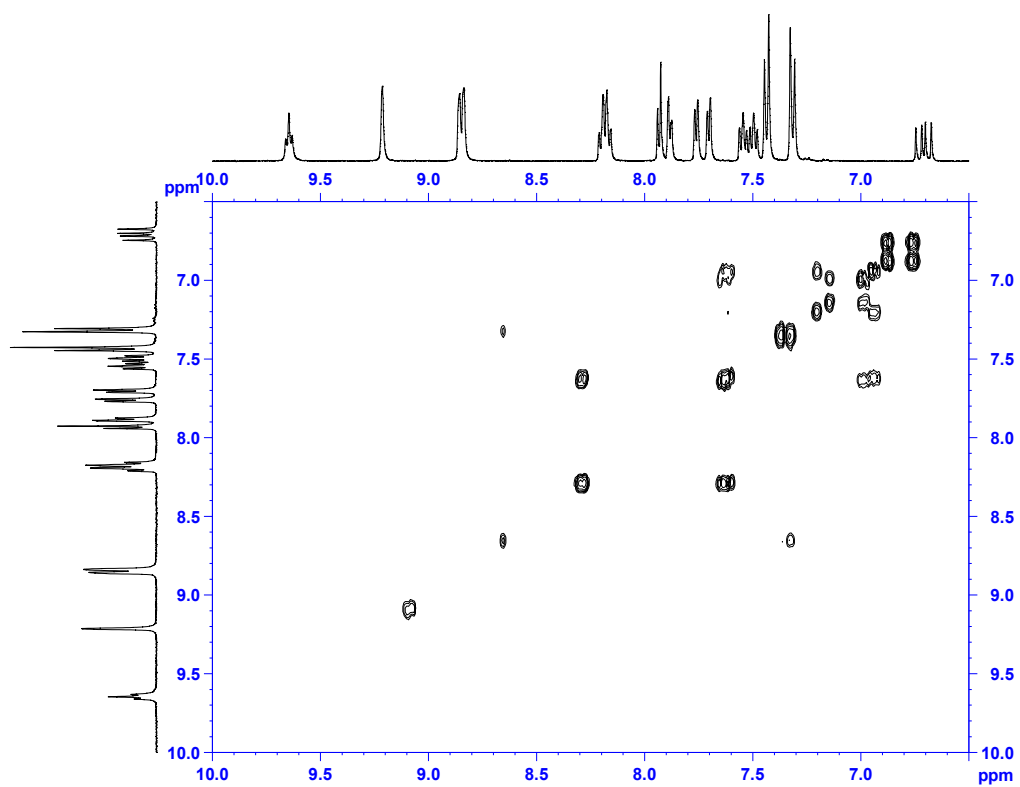

1f.  $^1\text{H}$ - $^1\text{H}$  Cosy-NMR of Ru2mono in D-DMSO in range from 10-6.5ppm
